# Supplementary material for: Features of the Italian Large Dams and their upstream catchments
Source: Copernicus journal article supplement (doi:10.5194/essd-2024-387), 2024-09-19
Supplement: Supplementary file [file essd-2024-387-AC1-supplement.pdf]

## **RC1**

The paper by Evangelista et al. introduces a detailed dataset of large dams in Italy, covering structural data (e.g., location, surface area, volume) and upstream catchment attributes (e.g., geomorphology, climate, extreme rainfall, land cover, soil).

The paper is well structured and well written, easily to follow and with figures drawn with care. The reading is smooth, and it provides detailed information regarding the methods used to build the dataset. The final aim of the dataset is of utmost importance as it may support diverse hydrological applications, from modelling to water resource management.

I have no major issues to point out, only some minor points that I list in the following.

In the Abstract “from the processing of updated and standardized grid data”, please consider adding a specification of the source

*R: The abstract has been revised to be more specific.*

Add a line in between rows in the last column of Table 1 as it difficult to read, the same applies to Table 2

*R: Corrected in the revised manuscript.*

**Line 234:** “NDVI” please provide the explanation of the acronym at its first appearance

*R: Corrected in the revised manuscript.*
